# Supplementary material for: GILZ inhibits the mTORC2/AKT pathway in BCR-ABL+ cells
Source: PubMed Central journal article supplement — Oncogene. 2011 Aug 1;31(11):1419–30. doi: 10.1038/onc.2011.328 (PMC3312406; doi:10.1038/onc.2011.328), 2011-08-01
Supplement: onc2011328x1.pdf [file onc2011328x1.pdf]

# Supplementary Figure S1

## GILZ RQ-PCR

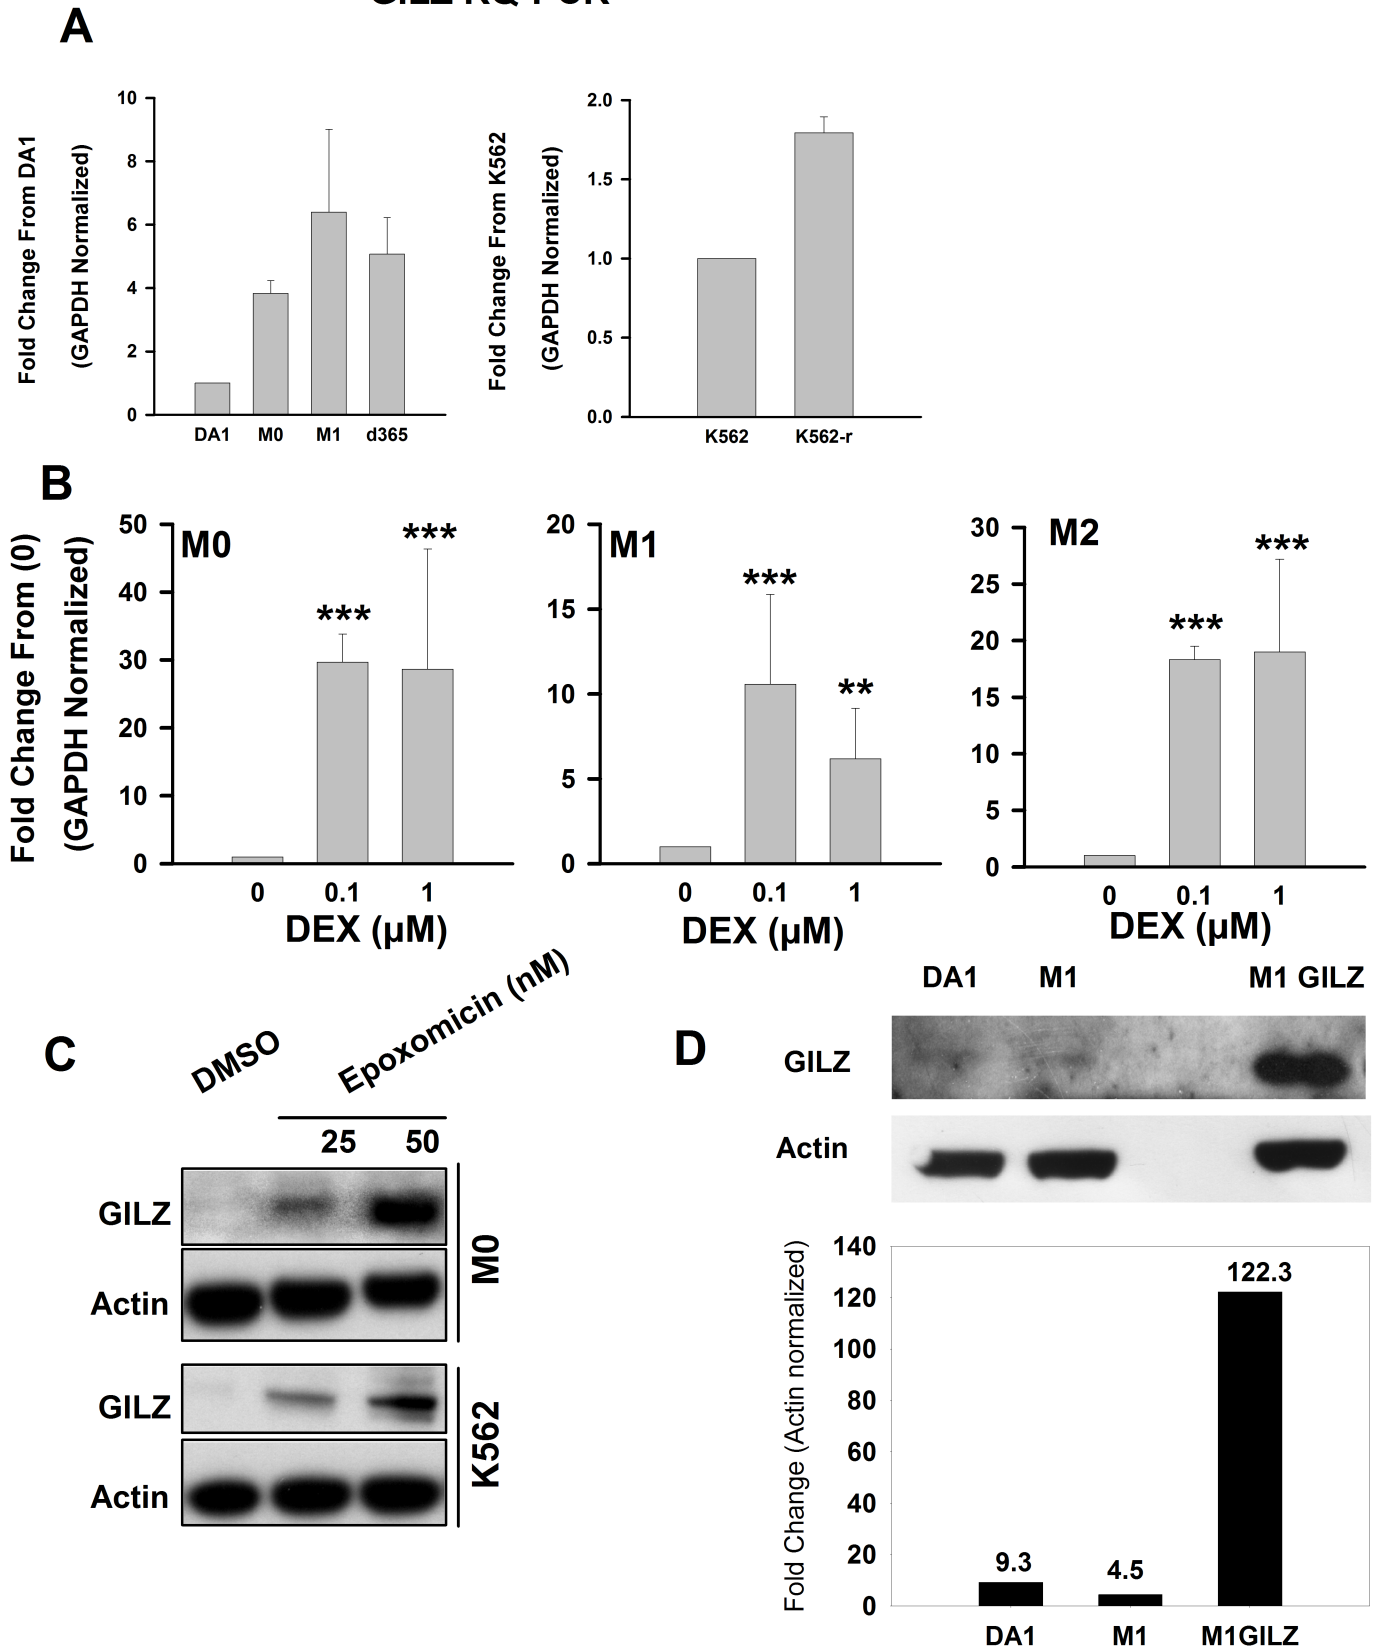

**Supplementary Figure S1:** (A) RQ-PCR analysis of the GILZ transcript in parental BCR-ABL-negative DA1 cells and in BCR-ABL-transformed DA1-3b cells (non-mutated M0, mutated M1 and dormant d365), as well as in imatinib-sensitive and resistant human K562 cells (\*\*  $p < 0.01$ , \*  $p < 0.05$ , Kruskal-Wallis test). Error bars represent the mean  $\pm$  s.d. of three independent experiments performed in duplicate. (B) As in (A), M0, M1 and M2 cells were exposed for 24 h to dexamethasone at the indicated concentrations (\*\*  $p < 0.01$ , \*\*\*  $p < 0.001$ , Kruskal-Wallis test). Error bars represent the mean  $\pm$  s.d. of three independent experiments performed in duplicate. (C) Western blot analysis of GILZ in M0 and K562 cells exposed for 24 h to epoxomicin at the indicated concentrations. Actin is shown as a loading control. (D) Western blot analysis of GILZ in DA1, M1, and M1 cells stably transfected with GILZ. Lower panel shows signal ratio between GILZ and actin.
