# Supplementary material for: GILZ inhibits the mTORC2/AKT pathway in BCR-ABL+ cells
Source: PubMed Central journal article supplement — Oncogene. 2011 Aug 1;31(11):1419–30. doi: 10.1038/onc.2011.328 (PMC3312406; doi:10.1038/onc.2011.328), 2011-08-01
Supplement: onc2011328x2.pdf [file onc2011328x2.pdf]

## Supplementary Figure S2

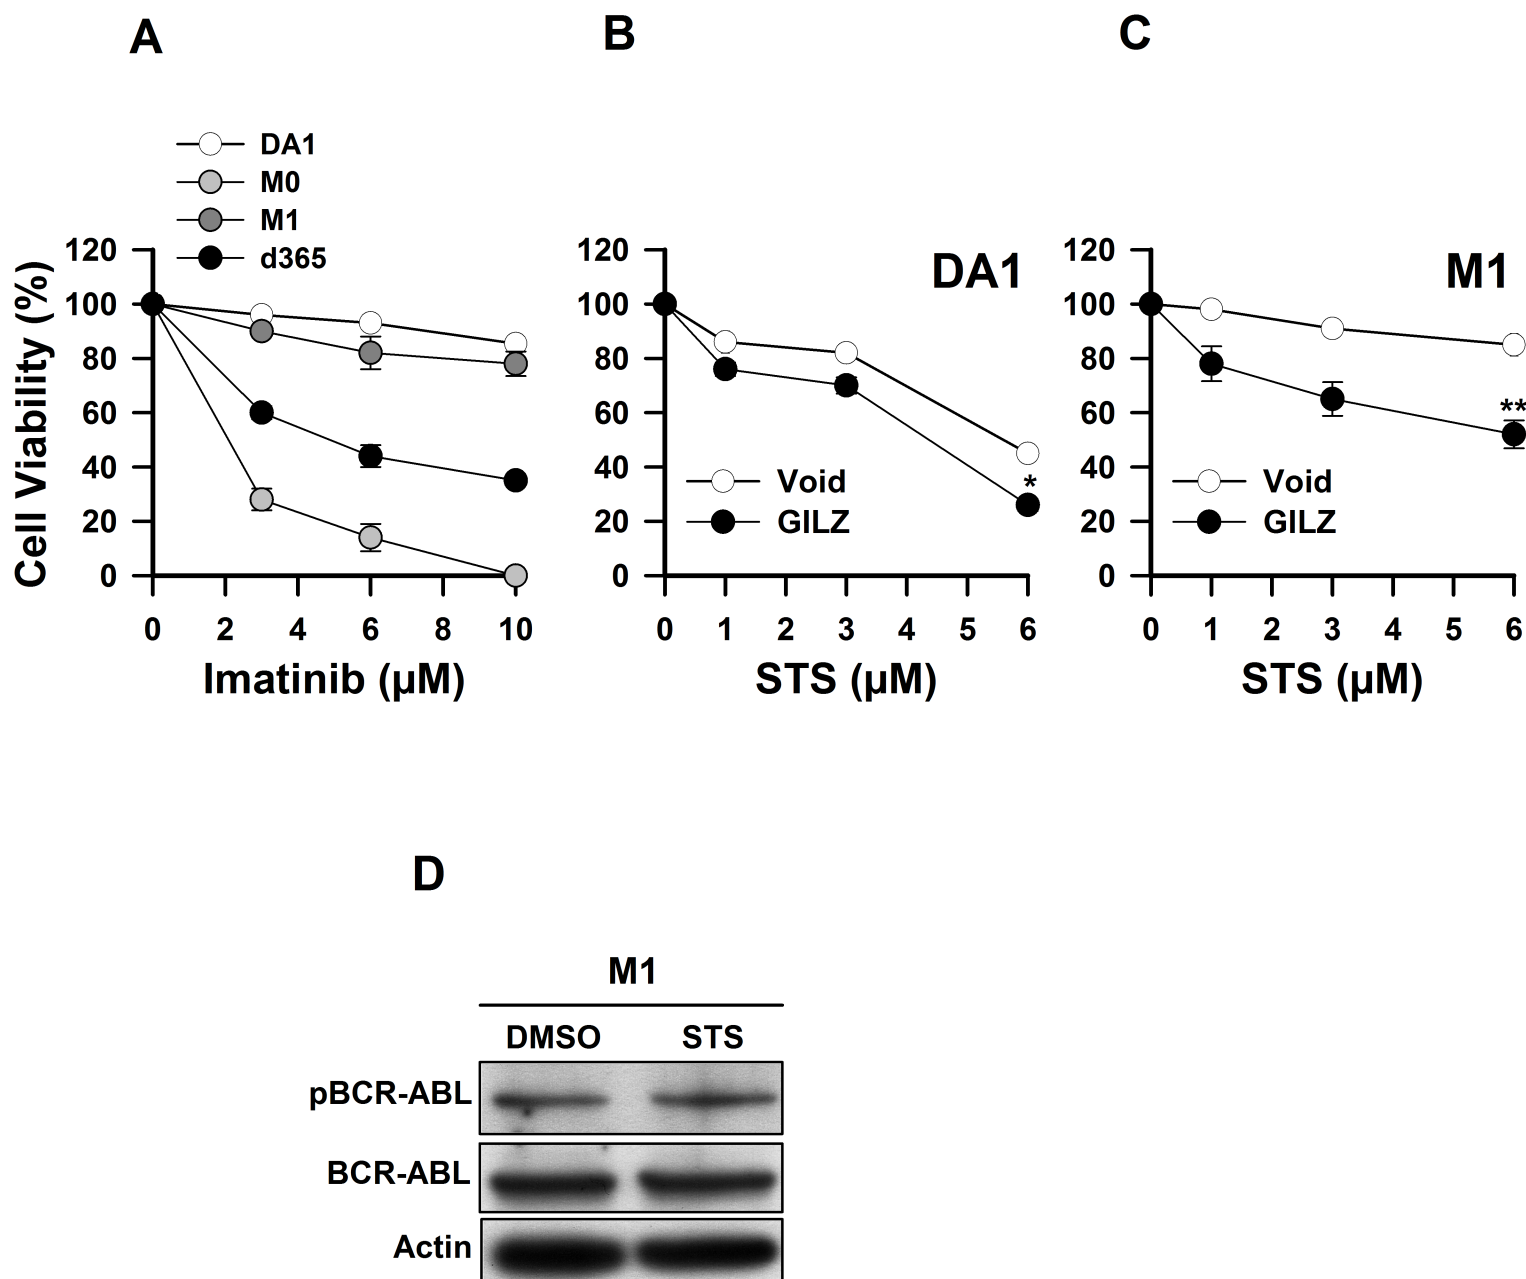

**Supplementary Figure S2: (A)** Cell viability measured by CMXRos retention in the BCR-ABL negative parental DA1 cells and in several BCR-ABL-transformed DA1-3b cell lines (non-mutated M0, mutated M1 and dormant d365) after a 24-h exposure to Imatinib. **(B)** Viability of DA1 cells (Void and GILZ) exposed for 24 h to staurosporine (STS) (\*  $p < 0.05$ , Kruskal-Wallis test). **(C)** Viability of M1 cells (Void and GILZ) exposed for 24 h to staurosporine (\*\*  $p < 0.01$ , Kruskal-Wallis test). Error bars represent the means  $\pm$  s.d. of three separate experiments performed in triplicate. **(D)** Western blot analysis of BCR-ABL phosphorylation in M1 cells exposed for 24 h to 6  $\mu$ M staurosporine (STS). Unphosphorylated BCR-ABL and actin are shown as loading controls.
