# Supplementary material for: GILZ inhibits the mTORC2/AKT pathway in BCR-ABL+ cells
Source: PubMed Central journal article supplement — Oncogene. 2011 Aug 1;31(11):1419–30. doi: 10.1038/onc.2011.328 (PMC3312406; doi:10.1038/onc.2011.328), 2011-08-01
Supplement: onc2011328x3.pdf [file onc2011328x3.pdf]

# Supplementary Figure S3

M1

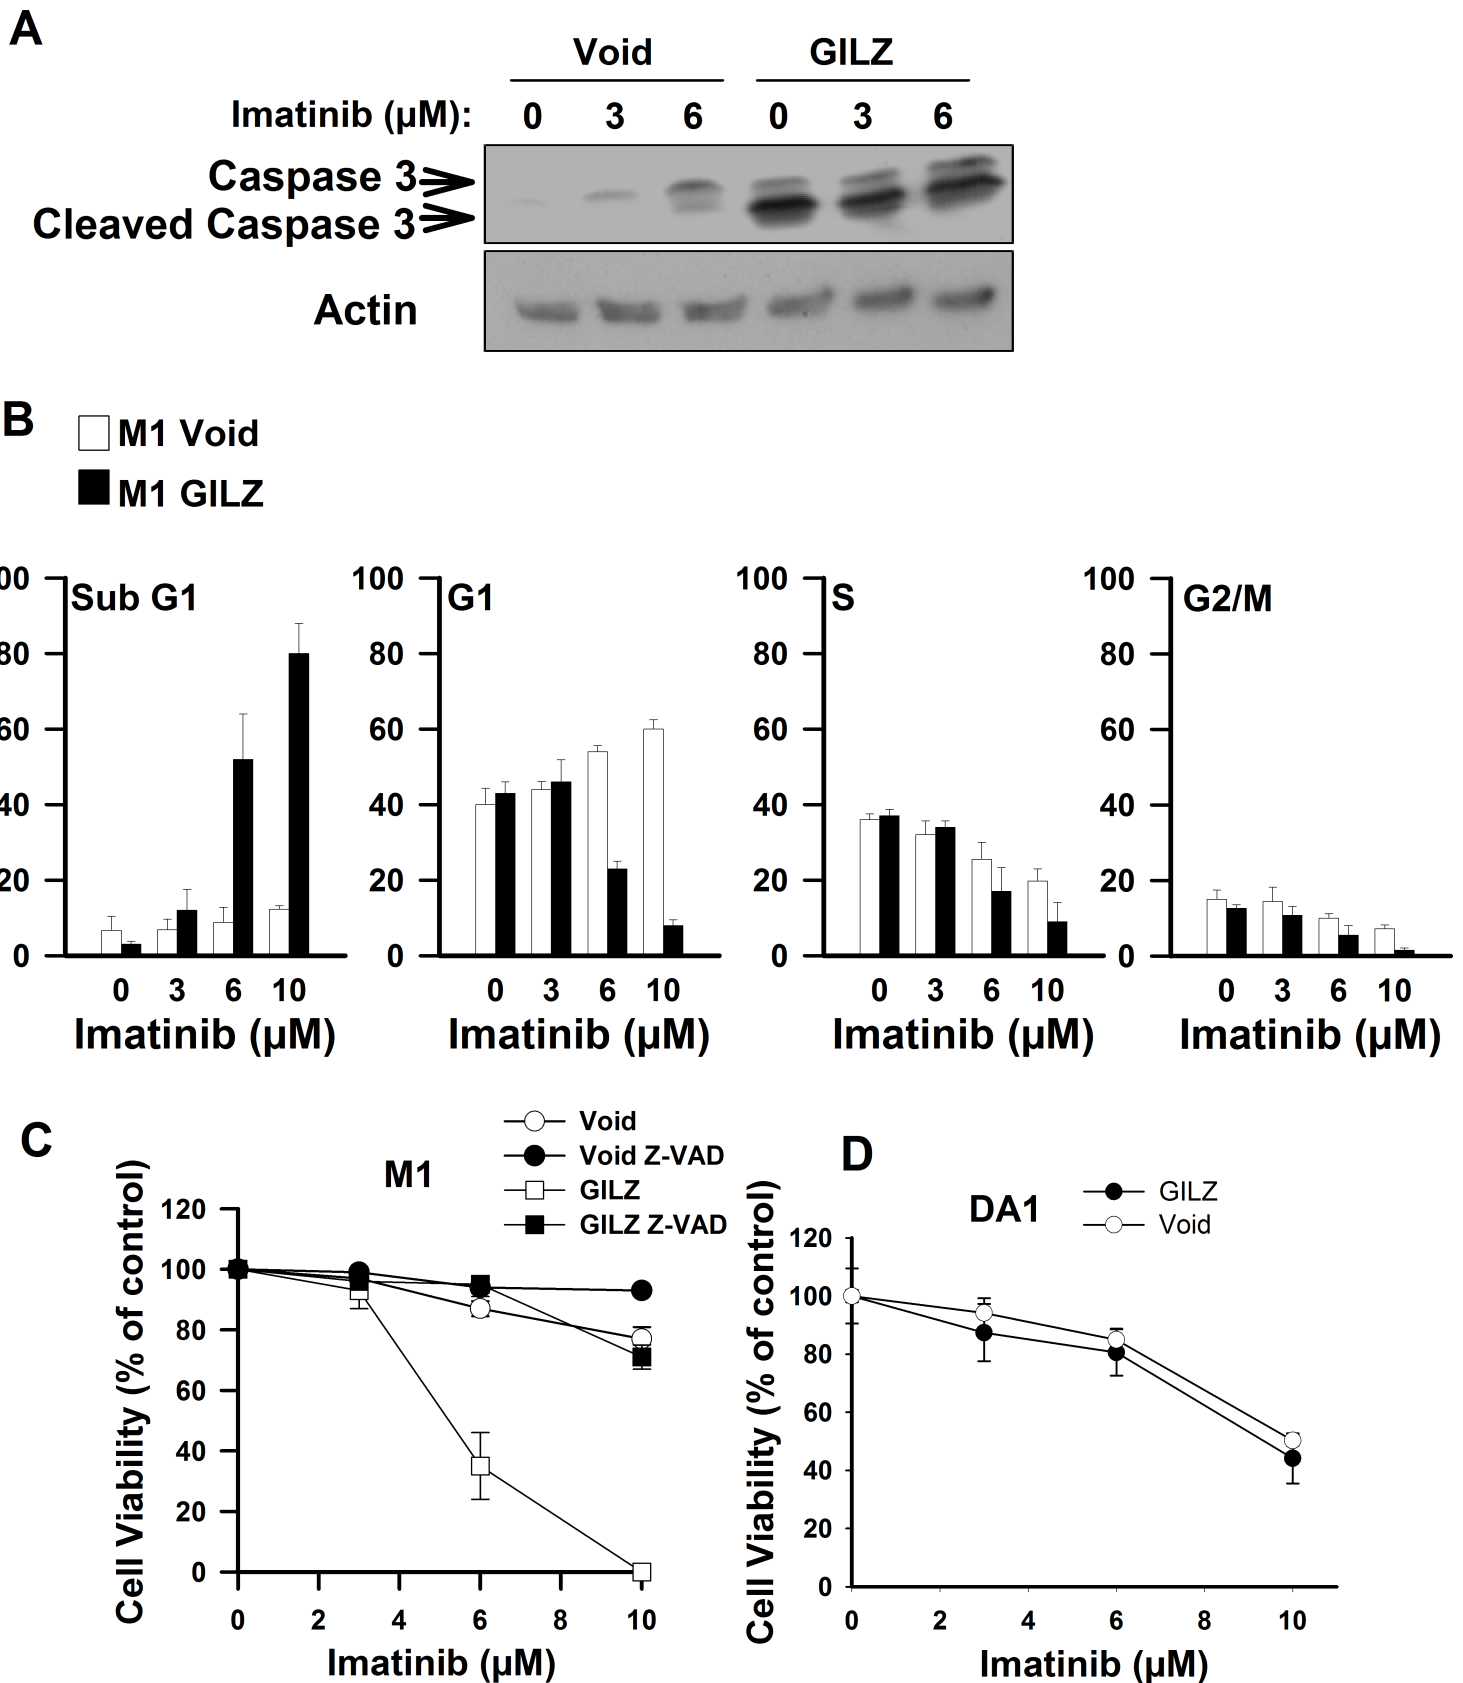

**Supplementary Figure S3:** (A) Caspase-3 activation analyzed by western blotting in M1 cells (Void and GILZ) exposed for 12 h to Imatinib. Actin is shown as a loading control. (B) Cell cycle analysis of M1 Void and GILZ exposed for 24 h to Imatinib. Error bars represent the means  $\pm$  s.d. of three independent experiments performed in triplicate. (C) Z-Vad-fmk inhibition of imatinib induced apoptosis in M1 Void and GILZ cells. (D) Cell viability of DA1 (Void and GILZ) cells under various concentrations of imatinib.
