# Supplementary material for: GILZ inhibits the mTORC2/AKT pathway in BCR-ABL+ cells
Source: PubMed Central journal article supplement — Oncogene. 2011 Aug 1;31(11):1419–30. doi: 10.1038/onc.2011.328 (PMC3312406; doi:10.1038/onc.2011.328), 2011-08-01
Supplement: onc2011328x4.pdf [file onc2011328x4.pdf]

## Supplementary Figure S4

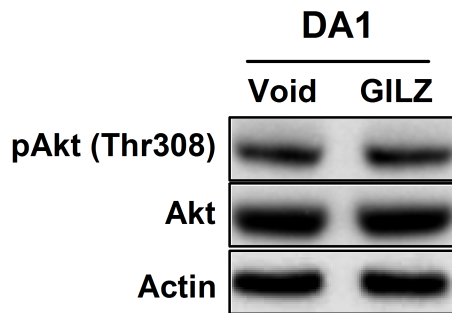

**Supplementary Figure S4:** Western blot analysis of Akt (Thr308) phosphorylation in DA1 (Void and GILZ) cells. Loading controls are actin and unphosphorylated Akt.
