# Supplementary material for: GILZ inhibits the mTORC2/AKT pathway in BCR-ABL+ cells
Source: PubMed Central journal article supplement — Oncogene. 2011 Aug 1;31(11):1419–30. doi: 10.1038/onc.2011.328 (PMC3312406; doi:10.1038/onc.2011.328), 2011-08-01
Supplement: onc2011328x5.pdf [file onc2011328x5.pdf]

## Supplementary Figure S5

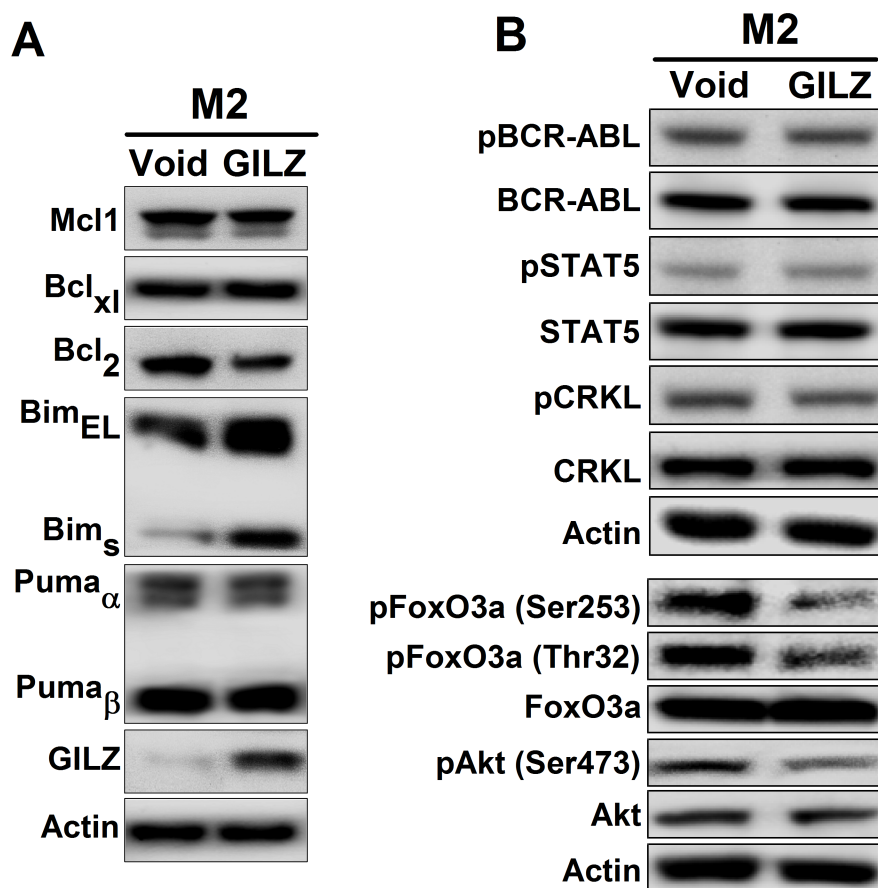

**Supplementary Figure S5: GILZ restores imatinib sensitivity in dasatinib-resistant M2 cells.**

**(A)** WB analysis of the Bcl-2 family members in M2-GILZ and M2-Void cells. **(B)** The phosphorylation states of BCR-ABL, CRKL, STAT5, FoxO3a and AKT (Ser473) were analyzed as in **(B)**.
