# Supplementary material for: GILZ inhibits the mTORC2/AKT pathway in BCR-ABL+ cells
Source: PubMed Central journal article supplement — Oncogene. 2011 Aug 1;31(11):1419–30. doi: 10.1038/onc.2011.328 (PMC3312406; doi:10.1038/onc.2011.328), 2011-08-01
Supplement: onc2011328x6.pdf [file onc2011328x6.pdf]

# Supplementary Figure S6

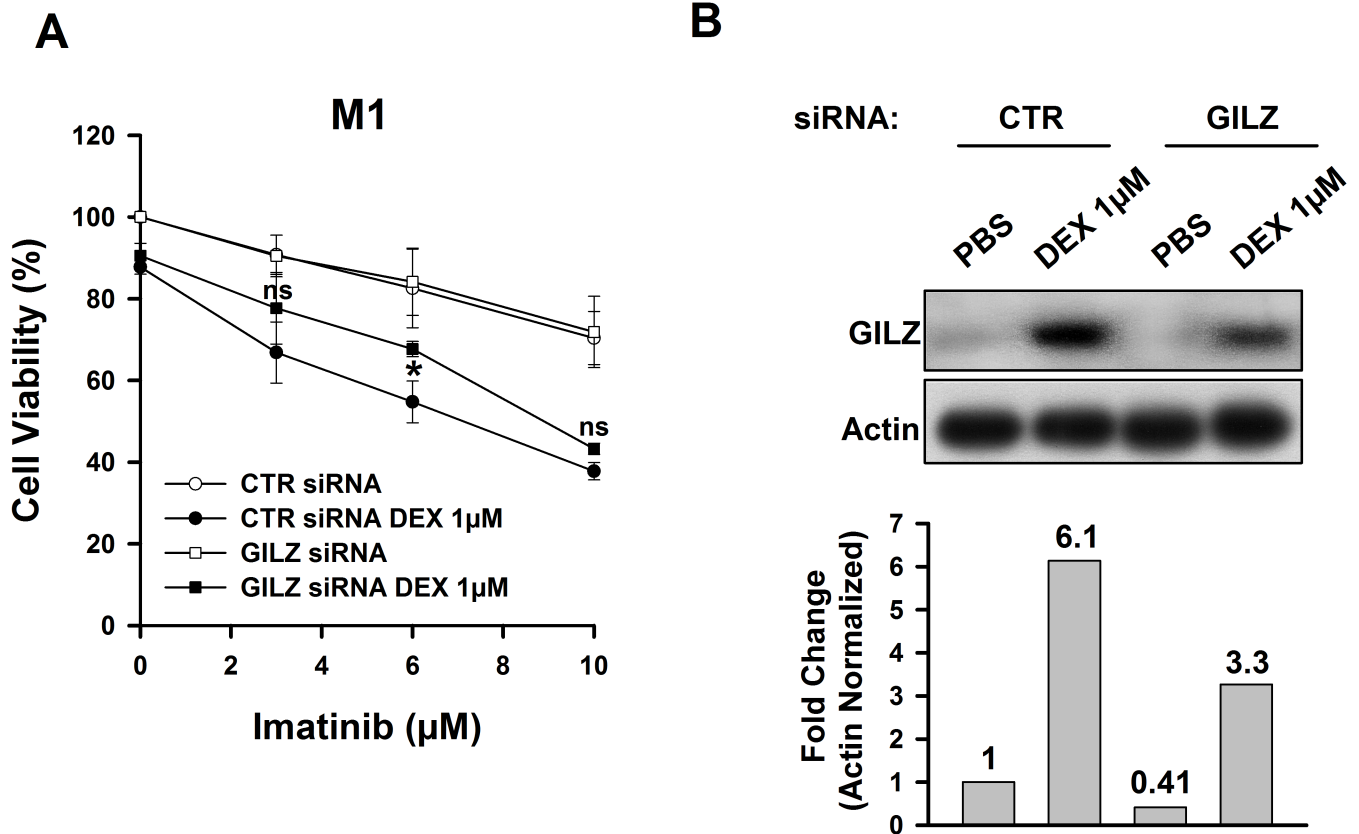

**Supplementary Figure S6: (A)** GILZ or scrambled (CTR) siRNA was transfected into M1 cells. After 6 h of recovery, the transfected cells were incubated with 1 µM dexamethasone for 24 h and then exposed to imatinib for 24 h. Cell viability was measured using the MTS assay (\*  $p < 0.05$ , Kruskal-Wallis test). Error bars represent the means  $\pm$  s.d. of three separate experiments performed in triplicate. **(B)** Western blot analysis of GILZ in siRNA-transfected M1 cells that had been exposed for 24 h to 1 µM dexamethasone. Actin is shown as a loading control. One representative of three experiments is shown. The numbers below refer to the fold-change of GILZ expression normalized to actin, with reference to non-treated scrambled siRNA-transfected M1 cells.
